# Supplementary material
Source: PubMed Central journal article supplement (PMC3314035)

Appendix 1 (as supplied by authors)

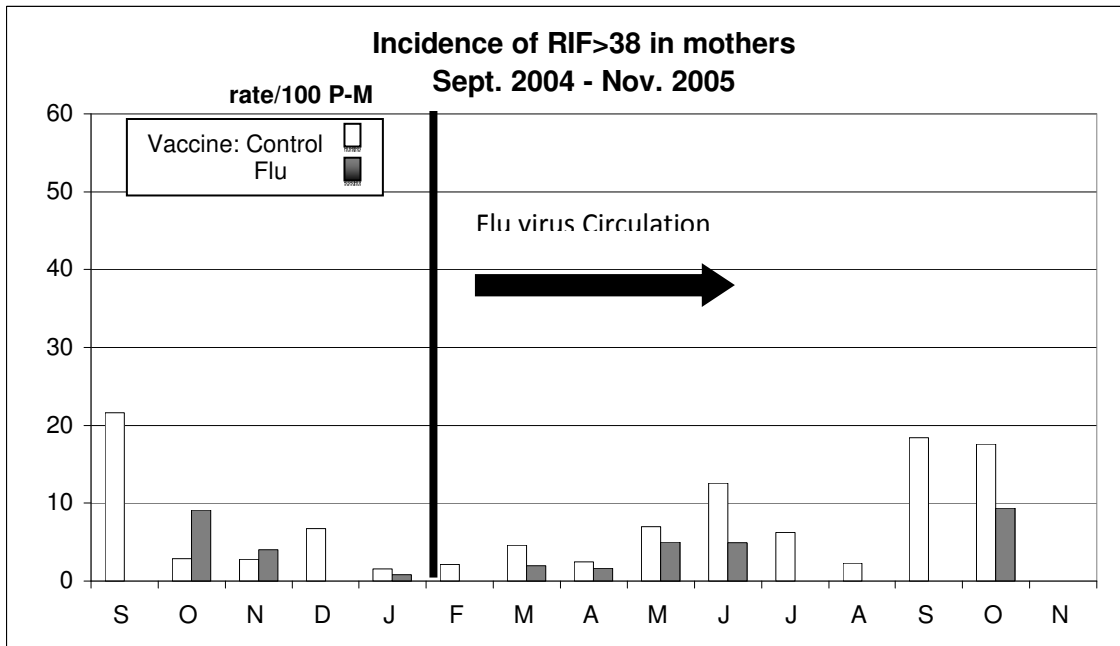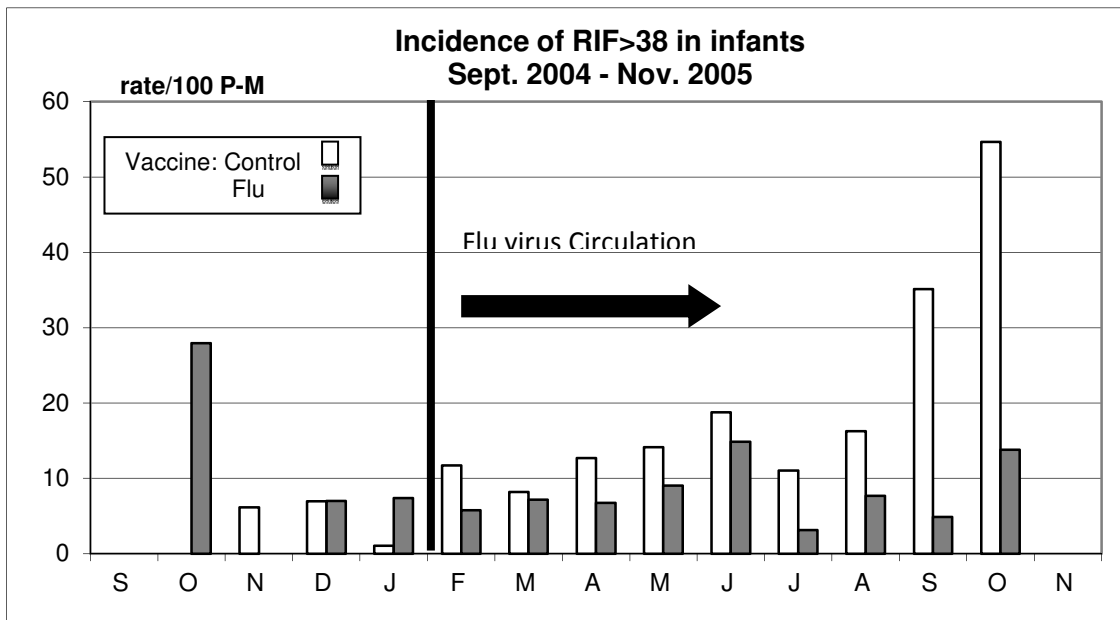

Supplement: supp_110754_neo-steinhoff-1-at.pdf [file supp_110754_neo-steinhoff-1-at.pdf]
